# Supplementary material for: A combined UV-visible with fluorescence detection method based on an unlabeled aptamer and AuNPs for the sensitive detection of acetamiprid
Source: Royal Society of Chemistry journal article supplement (doi:10.1039/d3nj00399j), 2023-01-01
Supplement: d3nj00399j1.pdf [file d3nj00399j1.pdf]

Electronic Supplementary Materials (ESI) for New Journal of chemistry

Supporting information for

**A Combined UV-Visible with Fluorescence Detection Method Based  
on Unlabeled Aptamer and AuNPs for the Sensitive Detection of  
Acetamiprid**

Liran Tian <sup>a,1</sup>, Xiangwei Song <sup>b,1</sup>, Tianjiao Liu <sup>a</sup>, Anfeng Li <sup>a</sup>, Yang Ning <sup>a</sup>, Xiuyi Hua <sup>a</sup>,  
Deming Dong <sup>a</sup>, Dapeng Liang <sup>a\*</sup>

\* Corresponding author.

<sup>1</sup> These authors contributed equally to the work.

**Addresses**

<sup>a</sup> Key Laboratory of Groundwater Resources and Environment of Ministry of Education, College of New Energy and Environment, Jilin University, Changchun, 130012, P. R. China.

<sup>b</sup> School of Life Sciences, Changchun Normal University, Changchun 130031, P. R. China

**Email address:** [liangdp@jlu.edu.cn](mailto:liangdp@jlu.edu.cn)

### Determination conditions of the HPLC:

Chromatographic column: C18 column (4.6 mm × 250 mm, 5 μm).

Temperature: 35°C

Mobile phase: acetonitrile : water = 3:7

Wavelength: 245 nm

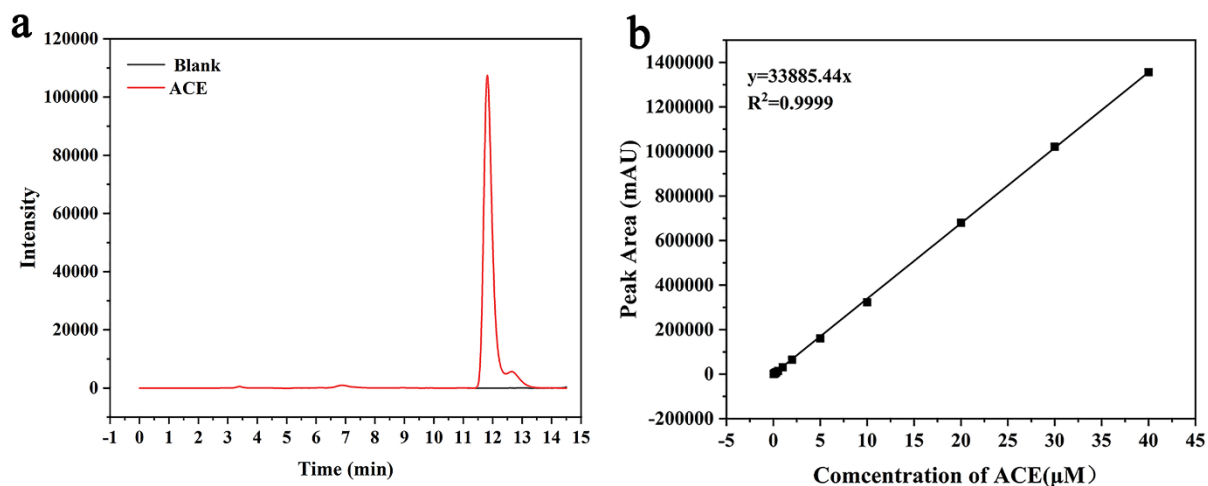

**Fig. S1** a Emergence time diagram for the determination of acetaminiprid using HPLC; b Standard curve for the determination of acetaminiprid using HPLC

**Table S1** Detection of added-acetaminiprid in real samples using HPLC

| Added (μM) | Detected (μM) | Recovery (%) | RSD (%) |
|------------|---------------|--------------|---------|
| 10         | 9.80          | 98           | 1.78    |
| 20         | 19.9          | 99.5         | 2.60    |
| 30         | 29.8          | 99.3         | 3.54    |
| 0.1        | 0.0889        | 88.9         | 14.5    |
| 0.15       | 0.135         | 90.0         | 3.64    |
| 0.2        | 0.176         | 88.0         | 0.89    |
